# Supplementary material
Source: Research Square preprint supplement (doi:10.21203/rs.3.rs-9261158/v1)

**Supplementary Table 1: Overview of TaqMan primers for q-PCR**

| **Gene** | **catalog number** |
| --- | --- |
| GJA1 | Hs00748445 |
| JPH2 | Hs00375310_m1 |
| ACTN2 | Hs00153809 |
| BIN1 | Hs00184913_m1 |
| CALM1 | Hs00300085_s1 |
| CALM2 | Hs00830212_s1 |
| CALM3 | Hs00968732_g1 |
| RYR2 | Hs00181461_m1 |
| CASQ2 | Hs00154286_m1 |
| ATP2A2 | Hs00544877_m1 |
| SLC8A1 | Hs01062258_m1 |
| PLN | Hs00160179_m1 |
| CACNA1C | Hs00167681 |
| KCNJ2 | Hs00265315_m1 |
| KCNQ1 | Hs00923522_m1 |
| KCND3 | Hs00986860_m1 |
| SCN5A | Hs00165693_m1 |
| GAPDH | Hs02758991_g1 |

**Supplementary Table 2: Beat-to-beat calcium transient parameters in CRISPRi and uncorrected CMTs.**

|  | Frequency (Hz) |  | Duration (ms) | Peak Amplitude (ΔF/F0) | Half-width (ms) | Time to % Peak (ms) | | Time to % Decay (ms) | |
| --- | --- | --- | --- | --- | --- | --- | --- | --- | --- |
| CRISPRi | 1 | N | 832.5 ± 51.2 | 0.31 ± 0.01 | 220.86 ± 41.1 | 10% | 3.76 ± 0.6 | 10% | 47±12.84 |
| 50% | 38.74 ± 14.6 | 50% | 149.1±27 |
| 90% | 70.51 ± 14.0 | 90% | 240.1±26 |
| N+1 | 845 ± 57 | 0.31 ± 0.01 | 225.7 ±28.1 | 10% | 3.77 ± 0.71 | 10% | 44.9±10.2 |
| 50% | 48.6 ±14.39 | 50% | 134.8±19.7 |
| 90% | 76.8 ± 12.32 | 90% | 237.8±16.1 |
| 0.5 | N | 1120 ± 84.85 | 0.37 ± 0.01 | 264.3 ± 35.8 | 10% | 5.02 ± 1.3 | 10% | 67.35±18.24 |
| 50% | 46.83 ± 12.16 | 50% | 160.6±16.6 |
| 90% | 111.34 ±1.18 | 90% | 295.4±2.85 |
| N+1 | 1015 ± 21.21 | 0.37 ± 0.002 | 233.2 ± 93.1 | 10% | 5.13 ± 0.47 | 10% | 60.78±3.08 |
| 50% | 47.5 ± 13.3 | 50% | 176.5±2.44 |
| 90% | 115.67 ± 5.9 | 90% | 328.9±1.5 |
| Uncorrected  CTRL | 1 | N | 1031 ± 74.1 | 0.3 ± 0.016 | 286.9± 48.1 | 10% | 7.33 ± 1.45 | 10% | 68.59±16.6 |
| 50% | 62.89± 13.2 | 50% | 174.1±29 |
| 90% | 134.8 ± 17.7 | 90% | 272±23.5 |
| N+1 | 988 ±94.7 | 0.21 ± 0.018** | 317.5 ± 58.4 | 10% | 6.43 ± 0.7 | 10% | 99.41±24.1 |
| 50% | 46.55 ± 12.67 | 50% | 171.5±22.5 |
| 90% | 147.9 ± 13.9 | 90% | 276.9±54.9 |
| 0.5 | N | 1875 ± 35.35 | 0.3 ± 0.017 | 418.5 ± 11.7 | 10% | 8.4 ± 1.25 | 10% | 139.93±19.56 |
| 50% | 63.5 ± 28.28 | 50% | 239.1±20.94 |
| 90% | 162.9 ± 17.4 | 90% | 430.9±21.7 |
| N+1 | 1690 ± 14.14* | 0.25 ± 0.011* | 365.8 ± 20.8 | 10% | 6.76 ± 1.03 | 10% | 120.93±15.33* |
| 50% | 52.3 ±10.1 | 50% | 194.7±10.33* |
| 90% | 188.4± 25.1 | 90% | 367.5±32.6 |

Supplementary Figure 1: A-D: flow cytometry data show Troponin T expression of CMs from 4 different differentiations. E-F: Fluorescence expression of KRAB transcriptional repressor in hiPSC-CMs, used to quantify transduction efficiency (31–34%). (gray: Without virus treatment, blue: uncorrected control (CTRL) red: CRISPRi)


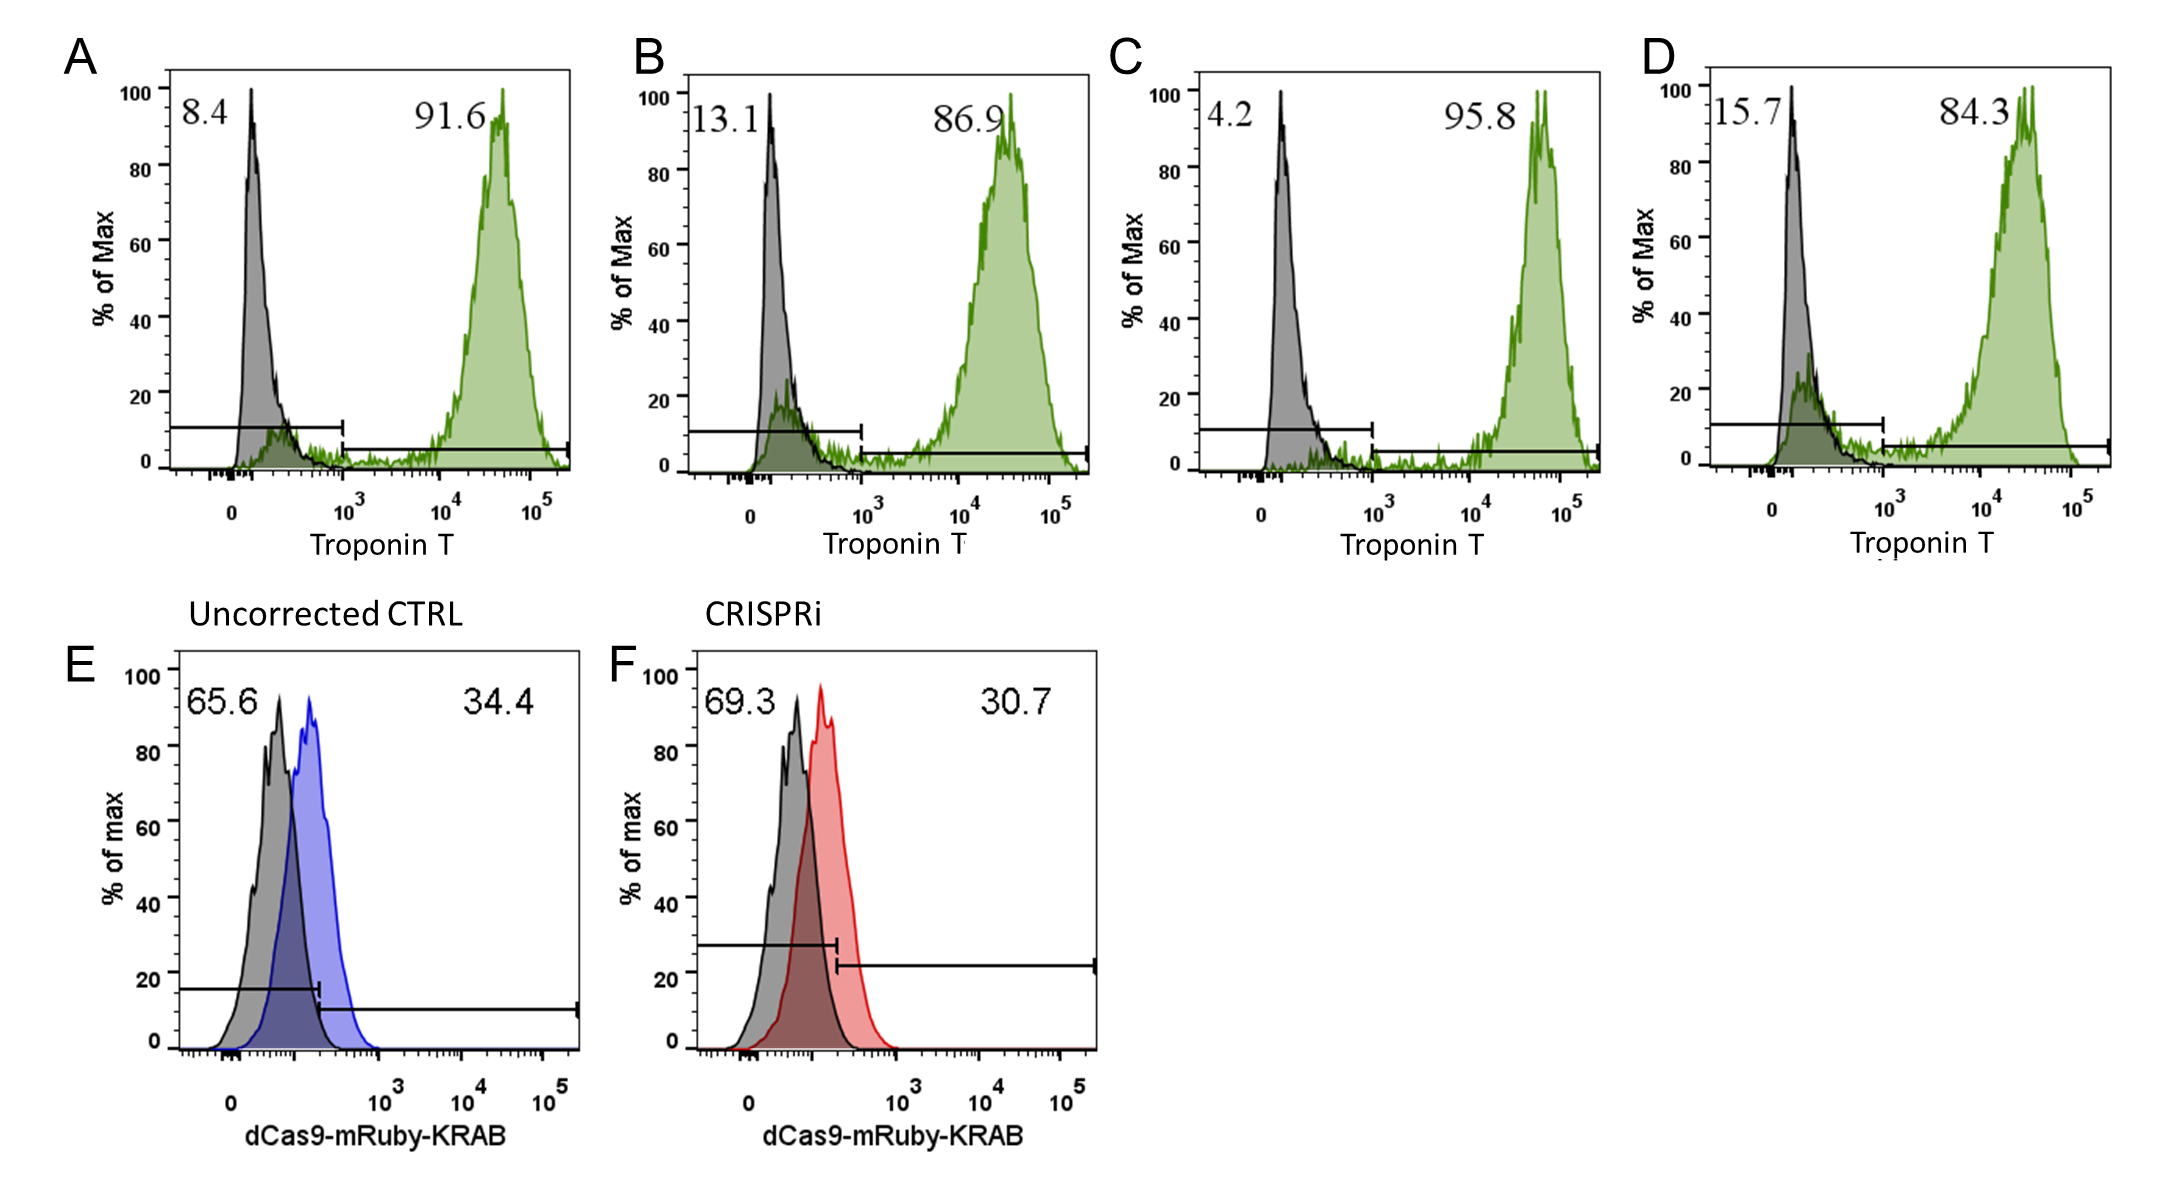


Supplementary Figure 2: Morphology of untreated, CRISPRi and uncorrected control CMTs. Scale bar: 200 µm.


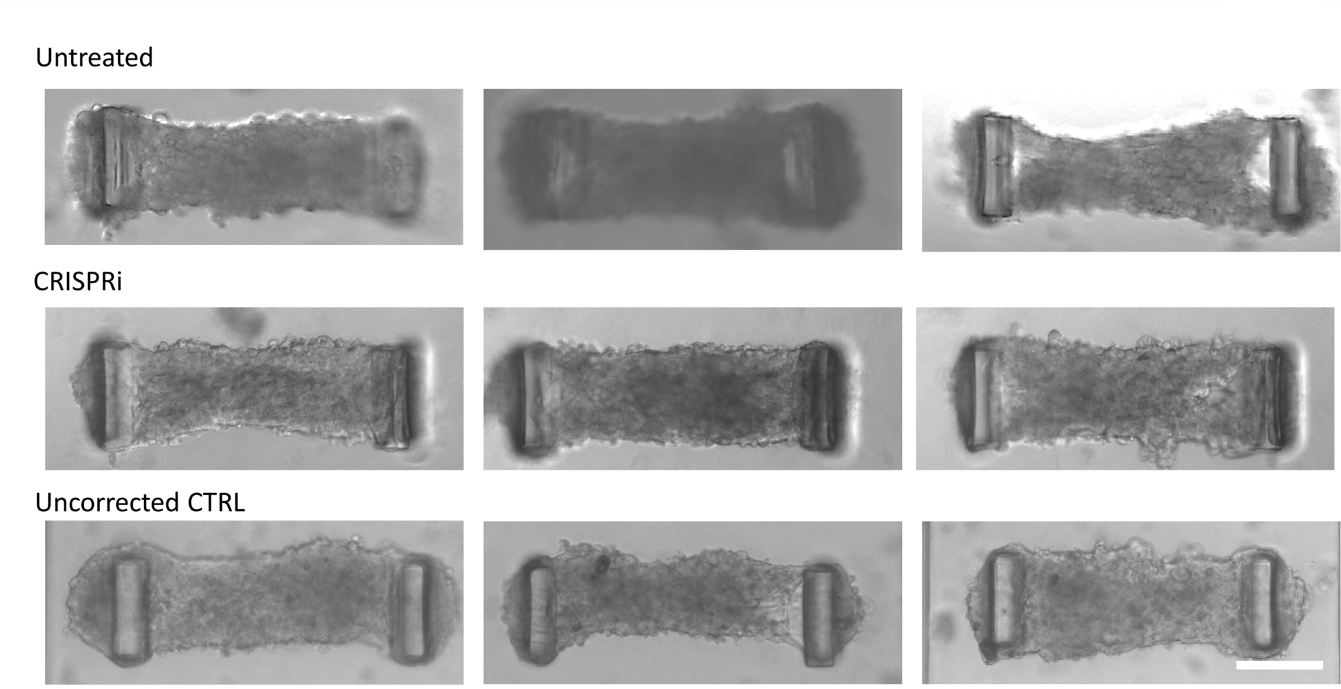


Supplementary Figure 3: Action potential traces of CRISPRi vs uncorrected CTRL CMTs at different pacing cycle length.


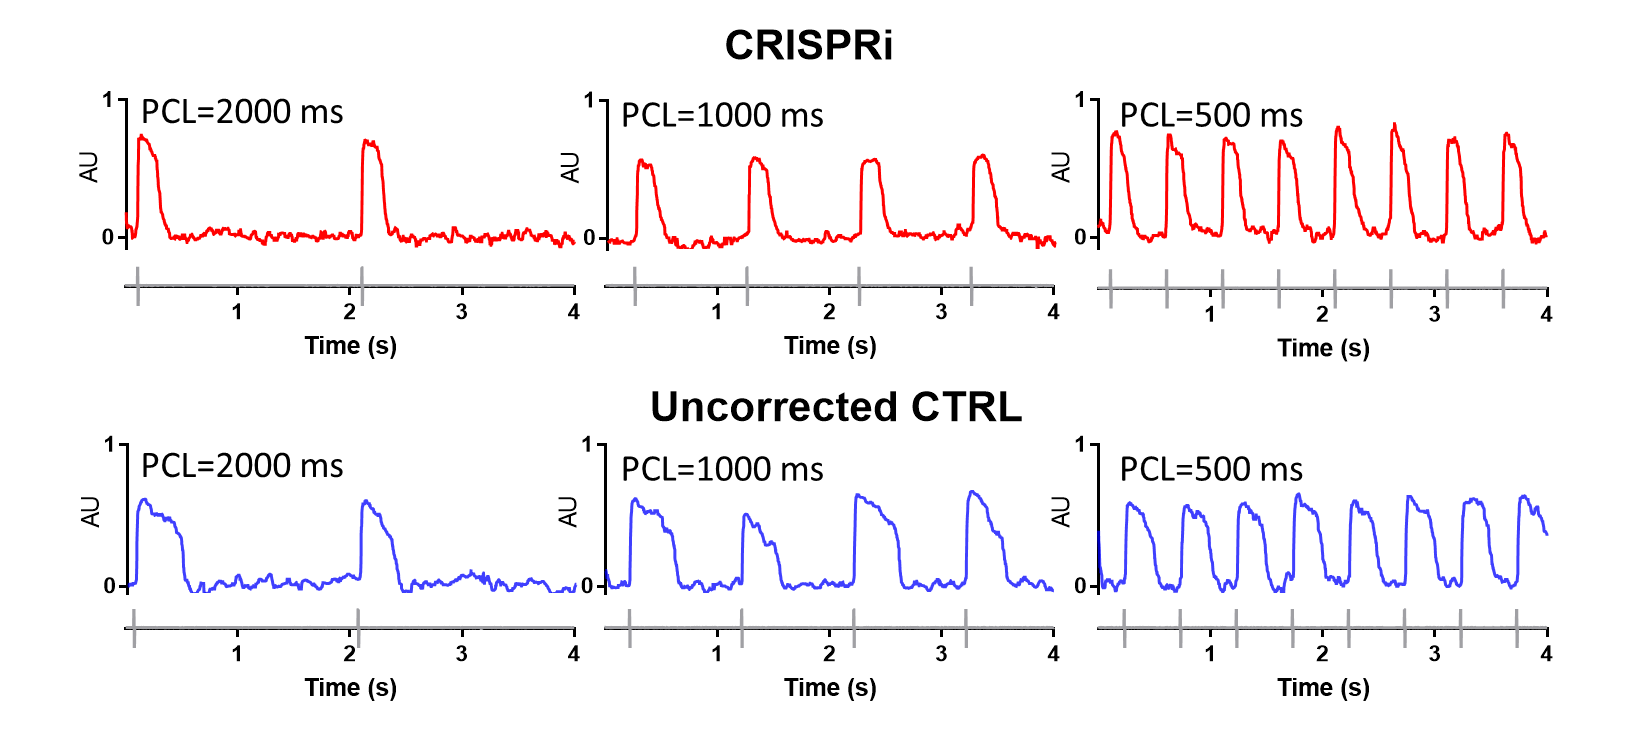


Supplementary Figure 4: Representative force traces of CRISPRi and uncorrected CTRL CMTs.


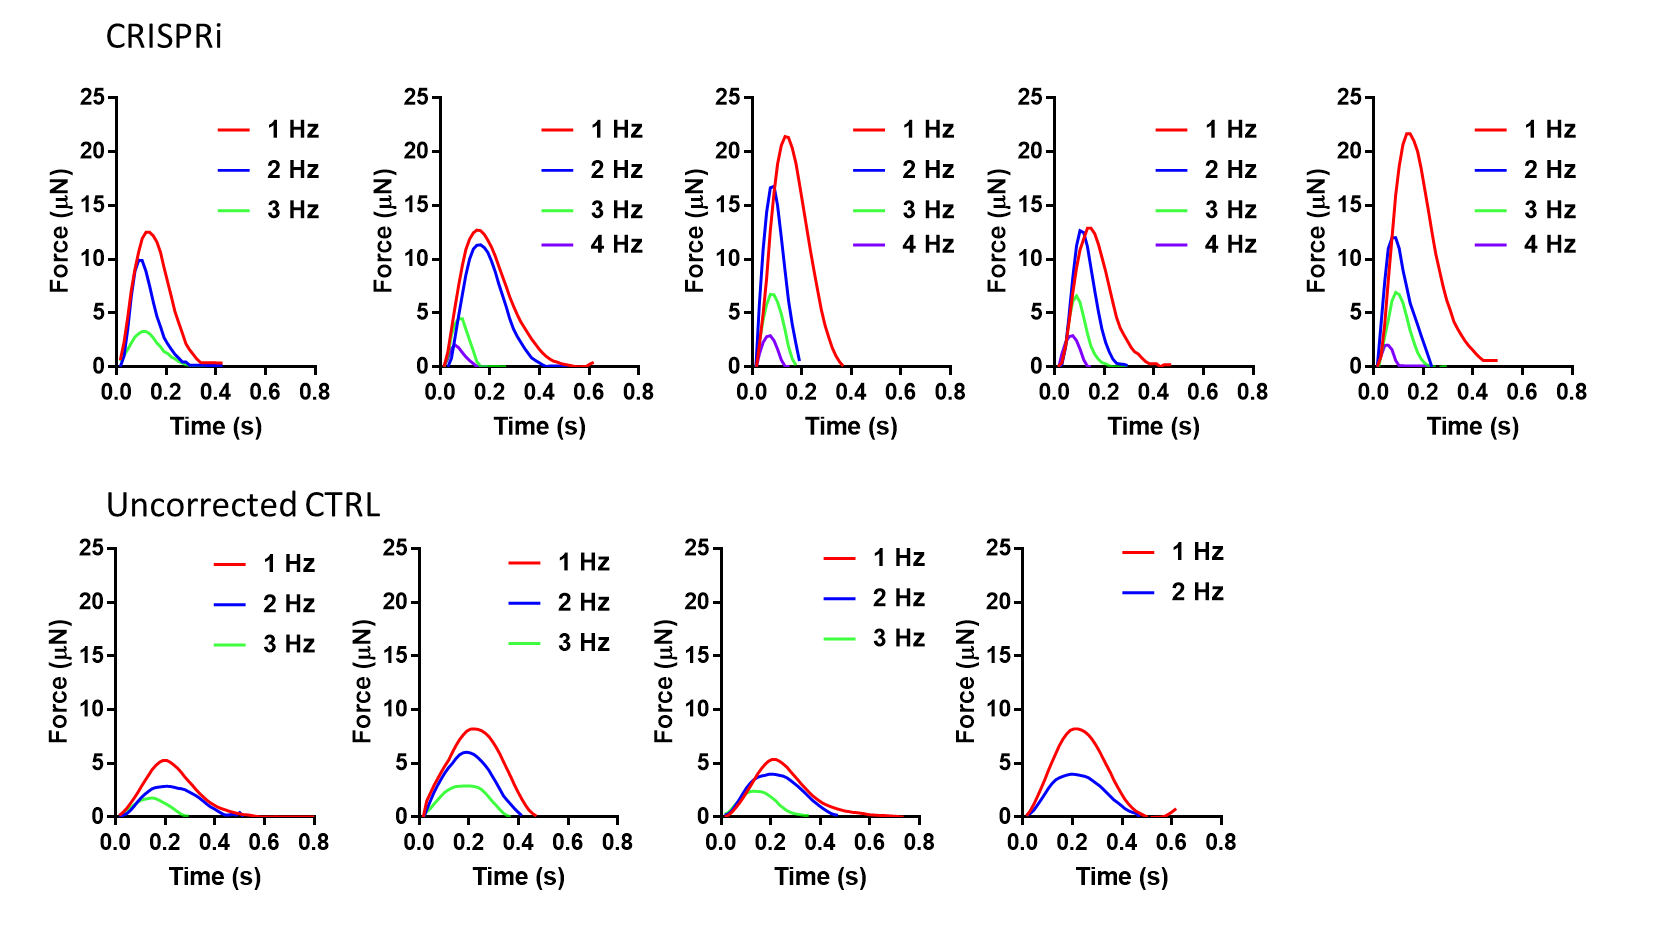


Supplementary Figure 5: TEM of CRISPRi and uncorrected CTRL CMTs.


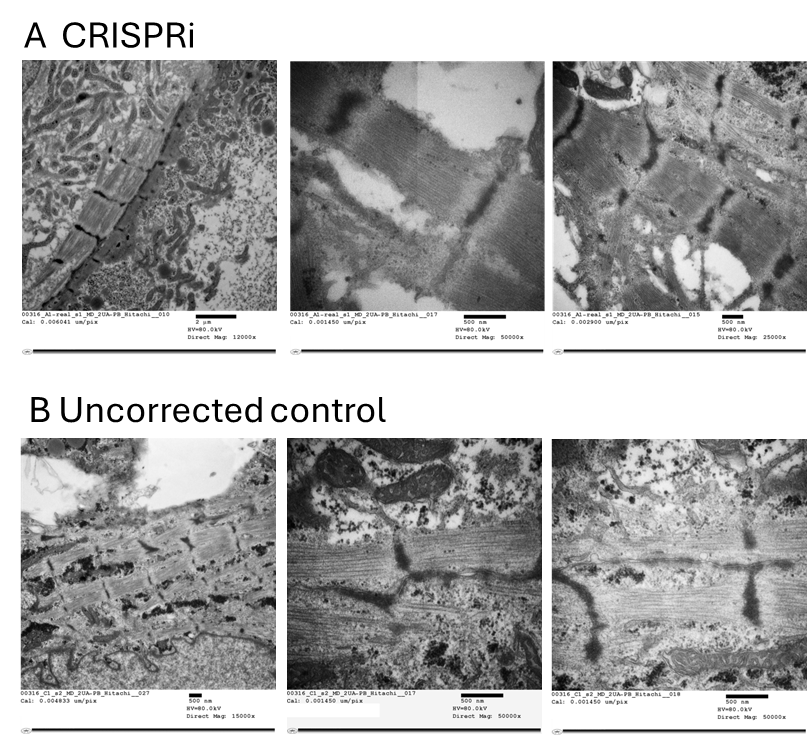

Supplement: Supplementary file 1 [file 4d4f2e05a1659e72e630daa5.docx]
